# Supplementary material
Source: MDPI journal article supplement (https://www.mdpi.com/2075-163X/13/8/1086)
Supplement: s1 [file s1]

## Appendix A

**Table S1. Chemical analyses of garnets from studied alkaline rocks.**

| Oxide                                                                                                                | Bolshaya Tagna |       |       |       |       |       |       |       |       |       |       |       |       |       |       |       |       |       |       |       |       |       |       |       | Srednaya Zima |        |        |        |        |       |        |       |        |       |        |       |      |
|----------------------------------------------------------------------------------------------------------------------|----------------|-------|-------|-------|-------|-------|-------|-------|-------|-------|-------|-------|-------|-------|-------|-------|-------|-------|-------|-------|-------|-------|-------|-------|---------------|--------|--------|--------|--------|-------|--------|-------|--------|-------|--------|-------|------|
|                                                                                                                      | K23/19         |       |       |       |       |       |       |       |       |       |       |       | 25/19 |       |       |       |       |       |       |       |       |       |       |       | 33/21         |        |        |        |        |       |        |       |        |       |        |       |      |
|                                                                                                                      | 1              | 2     | 3     | 4     | 5     | 6     | 7     | 8     | 9     | 10    | 11    | 12    | 1     | 2     | 3     | 4     | 5     | 6     | 7     | 8     | 9     | 10    | 11    | 12    | 1             | 2      | 3      | 4      | 5      | 6     | 7      | 8     | 9      | 10    | 11     | 12    |      |
| Na <sub>2</sub> O                                                                                                    | 0.37           | 0.21  | 0.43  | 0.44  | 0.36  | 0.44  | 0.3   | 0.17  | 0.15  | 0.28  | 0.24  | 0.23  | -     | 0.24  | 0.23  | 0.11  | -     | 0.12  | -     | 0.11  | -     | 0.19  | 0.42  | 0.27  | 0.25          | 0.19   | 0.22   | 0.11   | 0.17   | 0.18  | 0.25   | 0.17  | 0.16   | 0.17  | 0.19   | 0.1   |      |
| MgO                                                                                                                  | 0.13           | -     | 0.33  | 0.14  | 0.57  | 0.14  | 0.78  | 0.12  | 0.66  | 0.58  | 0.28  | 0.69  | 0.62  | 0.48  | 0.17  | 0.57  | 0.27  | 0.60  | 0.81  | 0.80  | 0.69  | 0.78  | 0.24  | 0.36  | 0.86          | 0.96   | 0.99   | 0.99   | 0.94   | 1.02  | 0.97   | 0.95  | 1.00   | 1.00  | 0.83   | 0.97  |      |
| Al <sub>2</sub> O <sub>3</sub>                                                                                       | 0.59           | 0.45  | 0.34  | 0.70  | 0.71  | 0.32  | 0.62  | 0.63  | 0.90  | 0.79  | 0.66  | 0.42  | 2.92  | 1.00  | 0.88  | 2.90  | 1.69  | 2.69  | 2.57  | 2.62  | 2.87  | 2.57  | 0.61  | 0.89  | 3.21          | 3.08   | 3.79   | 3.17   | 3.28   | 3.27  | 3.34   | 3.37  | 3.22   | 3.43  | 3.29   | 3.58  |      |
| SiO <sub>2</sub>                                                                                                     | 33.05          | 33.64 | 31.81 | 34.19 | 29.33 | 33.08 | 31.3  | 34.51 | 28.64 | 29.12 | 33.6  | 31.26 | 32.57 | 32.91 | 33.34 | 32.85 | 30.82 | 32.96 | 32.4  | 32.47 | 32.42 | 31.39 | 33.54 | 32.93 | 30.44         | 30.36  | 31.86  | 30.45  | 30.45  | 31.15 | 31.14  | 30.24 | 30.03  | 29.83 | 31.01  | 31.15 |      |
| CaO                                                                                                                  | 31.35          | 31.27 | 31.32 | 31.72 | 31.6  | 31.25 | 31.16 | 31.85 | 31.4  | 31.54 | 31.47 | 31.42 | 32.08 | 31.85 | 31.8  | 32.25 | 32.02 | 32.35 | 32.41 | 31.96 | 32.05 | 32.09 | 31.63 | 31.67 | 32.49         | 32.13  | 32.51  | 32.24  | 32.23  | 32.63 | 32.5   | 32.31 | 32.46  | 32.17 | 32.79  | 32.55 |      |
| TiO <sub>2</sub>                                                                                                     | 7.00           | 5.36  | 9.71  | 5.96  | 11.63 | 8.55  | 8.65  | 3.96  | 12.73 | 12.65 | 5.21  | 10.52 | 7.07  | 8.11  | 6.33  | 7.5   | 8.37  | 7.52  | 8.42  | 8.33  | 6.92  | 10.03 | 6.61  | 6.56  | 12.62         | 11.84  | 10.43  | 12.04  | 12.00  | 11.48 | 11.43  | 11.43 | 12.59  | 12.44 | 11.64  | 10.31 |      |
| V <sub>2</sub> O <sub>3</sub>                                                                                        | 0.74           | -     | -     | 0.66  | 0.55  | -     | -     | -     | -     | -     | 0.49  | -     | -     | -     | -     | -     | -     | -     | -     | -     | -     | -     | -     | -     | -             | -      | -      | -      | -      | -     | -      | -     | -      | -     | -      | -     |      |
| MnO                                                                                                                  | 0.69           | 0.62  | 0.55  | 0.81  | 0.33  | 0.58  | 0.50  | 0.53  | 0.43  | 0.44  | 0.83  | 0.47  | 0.33  | 0.41  | 0.43  | 0.15  | 0.31  | 0.35  | 0.4   | 0.43  | 0.33  | 0.39  | 0.42  | 0.42  | 0.36          | 0.49   | 0.54   | 0.52   | 0.44   | 0.37  | 0.30   | 0.35  | 0.43   | 0.49  | 0.37   | 0.46  |      |
| FeO <sub>t</sub>                                                                                                     | 24.49          | 24.8  | 22.93 | 24.82 | 21.62 | 23.59 | 22.58 | 25.95 | 22.11 | 21.82 | 24.52 | 22.22 | 21.22 | 23.69 | 24.26 | 21.81 | 23.41 | 21.83 | 20.72 | 20.67 | 21.78 | 20.48 | 24.45 | 23.48 | 18.56         | 19.42  | 18.8   | 18.74  | 19.12  | 19.17 | 19.2   | 18.91 | 18.34  | 18.15 | 19.92  | 19.23 |      |
| ZrO <sub>2</sub>                                                                                                     | -              | 0.32  | 0.56  | -     | 1.43  | 0.56  | 2.18  | -     | 1.35  | 1.06  | 0.25  | 1.30  | 0.42  | 0.41  | 0.23  | 0.70  | 0.40  | 0.31  | 0.47  | 0.42  | 0.44  | 0.44  | 0.21  | 0.27  | 1.88          | 1.85   | 1.55   | 1.75   | 1.83   | 1.94  | 1.79   | 1.79  | 1.94   | 2.19  | 1.83   | 1.62  |      |
| Total                                                                                                                | 98.41          | 96.67 | 97.99 | 99.44 | 98.12 | 98.51 | 98.07 | 97.71 | 98.38 | 98.28 | 97.56 | 98.53 | 97.24 | 99.11 | 97.66 | 98.83 | 97.29 | 98.74 | 98.2  | 97.82 | 97.49 | 98.36 | 98.14 | 96.85 | 100.67        | 100.33 | 100.69 | 100.01 | 100.46 | 101.2 | 100.91 | 99.53 | 100.18 | 99.87 | 101.87 | 99.98 |      |
| Mineral formulae calculated to 12 atoms of oxygen (Fe <sup>2+</sup> /Fe <sup>3+</sup> estimated from stoichiometry): |                |       |       |       |       |       |       |       |       |       |       |       |       |       |       |       |       |       |       |       |       |       |       |       |               |        |        |        |        |       |        |       |        |       |        |       |      |
| Ca                                                                                                                   | 2.83           | 2.87  | 2.85  | 2.82  | 2.89  | 2.82  | 2.84  | 2.87  | 2.87  | 2.88  | 2.85  | 2.85  | 2.90  | 2.85  | 2.88  | 2.87  | 2.92  | 2.88  | 2.91  | 2.87  | 2.89  | 2.88  | 2.85  | 2.89  | 2.87          | 2.85   | 2.85   | 2.87   | 2.85   | 2.86  | 2.85   | 2.88  | 2.88   | 2.87  | 2.86   | 2.88  |      |
| Mn                                                                                                                   | 0.05           | 0.04  | 0.04  | 0.06  | 0.02  | 0.04  | 0.04  | 0.04  | 0.03  | 0.03  | 0.06  | 0.03  | 0.02  | 0.03  | 0.03  | 0.01  | 0.02  | 0.02  | 0.03  | 0.03  | 0.02  | 0.03  | 0.03  | 0.03  | 0.03          | 0.03   | 0.04   | 0.04   | 0.03   | 0.03  | 0.02   | 0.02  | 0.03   | 0.03  | 0.03   | 0.03  |      |
| X Fe <sup>2+</sup>                                                                                                   | 0.05           | 0.05  | -     | 0.04  | -     | 0.05  | -     | 0.05  | -     | -     | 0.01  | -     | -     | 0.02  | 0.03  | 0.03  | 0.02  | -     | -     | -     | -     | -     | 0.02  | -     | -             | 0.02   | 0.03   | 0.03   | 0.02   | 0.03  | 0.03   | 0.04  | 0.03   | 0.03  | 0.03   | 0.03  | 0.02 |
| Na                                                                                                                   | 0.06           | 0.03  | 0.07  | 0.07  | 0.06  | 0.07  | 0.05  | 0.03  | 0.02  | 0.05  | 0.04  | 0.04  | -     | 0.04  | 0.04  | 0.02  | -     | 0.02  | -     | 0.02  | -     | 0.03  | 0.07  | 0.04  | 0.04          | 0.03   | 0.03   | 0.03   | 0.02   | 0.03  | 0.04   | 0.03  | 0.03   | 0.03  | 0.03   | 0.02  |      |
| Mg                                                                                                                   | 0.02           | -     | 0.04  | 0.02  | 0.07  | 0.02  | 0.10  | 0.02  | 0.08  | 0.07  | 0.04  | 0.09  | 0.08  | 0.06  | 0.02  | 0.07  | 0.03  | 0.07  | 0.07  | 0.08  | 0.09  | 0.06  | 0.03  | 0.04  | 0.06          | 0.09   | 0.08   | 0.08   | 0.09   | 0.08  | 0.09   | 0.07  | 0.06   | 0.07  | 0.08   | 0.07  |      |
| Fe <sup>3+</sup>                                                                                                     | 1.35           | 1.44  | 1.09  | 1.45  | 0.91  | 1.15  | 1.10  | 1.62  | 0.83  | 0.86  | 1.49  | 0.94  | 1.28  | 1.24  | 1.40  | 1.28  | 1.27  | 1.32  | 1.19  | 1.21  | 1.35  | 1.10  | 1.40  | 1.38  | 0.81          | 0.90   | 1.02   | 0.85   | 0.87   | 0.91  | 0.94   | 0.94  | 0.81   | 0.81  | 0.93   | 1.03  |      |
| Ti                                                                                                                   | 0.44           | 0.34  | 0.62  | 0.37  | 0.75  | 0.54  | 0.55  | 0.25  | 0.82  | 0.81  | 0.33  | 0.67  | 0.45  | 0.51  | 0.40  | 0.47  | 0.54  | 0.47  | 0.53  | 0.53  | 0.44  | 0.63  | 0.42  | 0.42  | 0.78          | 0.74   | 0.64   | 0.75   | 0.75   | 0.71  | 0.70   | 0.72  | 0.78   | 0.78  | 0.71   | 0.64  |      |
| Y Fe <sup>2+</sup>                                                                                                   | 0.16           | 0.20  | 0.27  | 0.13  | 0.28  | 0.28  | 0.26  | 0.13  | 0.29  | 0.29  | 0.16  | 0.33  | 0.21  | 0.23  | 0.19  | 0.21  | 0.18  | 0.20  | 0.22  | 0.23  | 0.18  | 0.21  | 0.18  | 0.18  | 0.29          | 0.26   | 0.23   | 0.29   | 0.28   | 0.26  | 0.26   | 0.23  | 0.26   | 0.27  | 0.26   | 0.21  |      |
| V                                                                                                                    | 0.04           | -     | -     | 0.04  | 0.03  | -     | -     | -     | -     | -     | 0.03  | -     | -     | -     | -     | -     | -     | -     | -     | -     | -     | -     | -     | -     | -             | -      | -      | -      | -      | -     | -      | -     | -      | -     | -      |       |      |
| Mg                                                                                                                   | -              | -     | -     | -     | -     | -     | -     | -     | -     | -     | -     | -     | -     | -     | -     | -     | -     | -     | 0.04  | 0.02  | -     | 0.03  | -     | 0.01  | 0.04          | 0.03   | 0.04   | 0.04   | 0.03   | 0.04  | 0.03   | 0.05  | 0.06   | 0.05  | 0.02   | 0.05  |      |

|   |                  |      |      |      |      |      |      |      |      |      |      |      |      |      |      |      |      |      |      |      |      |      |      |      |      |      |      |      |      |      |      |      |      |      |      |      |      |
|---|------------------|------|------|------|------|------|------|------|------|------|------|------|------|------|------|------|------|------|------|------|------|------|------|------|------|------|------|------|------|------|------|------|------|------|------|------|------|
|   | Al               | -    | -    | -    | -    | -    | -    | -    | -    | -    | -    | -    | -    | 0.04 | -    | -    | 0.01 | -    | -    | -    | -    | 0.01 | -    | -    | -    | -    | -    | -    | -    | -    | -    | -    | -    | -    | -    | -    | -    |
|   | Zr               | -    | 0.01 | 0.02 | -    | 0.06 | 0.02 | 0.09 | -    | 0.06 | 0.04 | 0.01 | 0.05 | 0.02 | 0.02 | 0.01 | 0.03 | 0.02 | 0.01 | 0.02 | 0.02 | 0.02 | 0.02 | 0.01 | 0.01 | 0.08 | 0.07 | 0.06 | 0.07 | 0.07 | 0.08 | 0.07 | 0.07 | 0.08 | 0.09 | 0.07 | 0.07 |
|   | Si               | 2.78 | 2.88 | 2.70 | 2.84 | 2.50 | 2.79 | 2.66 | 2.91 | 2.45 | 2.48 | 2.84 | 2.65 | 2.75 | 2.75 | 2.82 | 2.73 | 2.63 | 2.74 | 2.71 | 2.72 | 2.73 | 2.63 | 2.82 | 2.80 | 2.51 | 2.51 | 2.60 | 2.53 | 2.51 | 2.55 | 2.55 | 2.52 | 2.49 | 2.48 | 2.53 | 2.57 |
| Z | Al               | 0.06 | 0.05 | 0.03 | 0.07 | 0.07 | 0.03 | 0.06 | 0.06 | 0.09 | 0.08 | 0.07 | 0.04 | 0.25 | 0.10 | 0.09 | 0.27 | 0.17 | 0.26 | 0.25 | 0.26 | 0.27 | 0.25 | 0.06 | 0.09 | 0.31 | 0.30 | 0.37 | 0.31 | 0.32 | 0.32 | 0.33 | 0.31 | 0.34 | 0.32 | 0.35 |      |
|   | Fe <sup>3+</sup> | 0.16 | 0.08 | 0.27 | 0.09 | 0.43 | 0.18 | 0.28 | 0.03 | 0.46 | 0.44 | 0.09 | 0.31 | -    | 0.15 | 0.10 | -    | 0.20 | -    | 0.03 | 0.02 | -    | 0.12 | 0.12 | 0.11 | 0.18 | 0.19 | 0.03 | 0.16 | 0.17 | 0.14 | 0.13 | 0.15 | 0.20 | 0.18 | 0.16 | 0.08 |

\* - potentially significant components [33.]

**Table S2. Chemical composition of ultramafic-alkaline rock series of Srednaya Zima and Bolshaya Tagna complexes.**

| Oxide,<br>Wt. % | Bolshaya Tagna |       |       |       |       |       |       |       |       |       | Srednaya Zima |       |       |       |       |       |
|-----------------|----------------|-------|-------|-------|-------|-------|-------|-------|-------|-------|---------------|-------|-------|-------|-------|-------|
|                 | 1              | 2     | 3     | 4     | 5     | 6     | 7     | 8     | 9     | 10    | 11            | 12    | 13    | 14    | 15    | 16    |
| SiO2            | 36.08          | 33.90 | 31.03 | 32.81 | 31.94 | 34.04 | 42.48 | 40.07 | 52.38 | 46.89 | 38.74         | 41.05 | 43.27 | 48.21 | 46.66 | 52.42 |
| TiO2            | 1.48           | 2.20  | 1.57  | 2.43  | 2.03  | 2.16  | 1.90  | 3.66  | 0.18  | 1.34  | 0.56          | 0.87  | 0.75  | 0.16  | 0.46  | 0.60  |
| Al2O3           | 12.44          | 12.98 | 9.45  | 15.73 | 13.11 | 15.40 | 14.57 | 16.49 | 9.37  | 12.08 | 6.99          | 7.63  | 3.38  | 16.17 | 15.06 | 16.71 |
| Fe2O3           | 6.08           | 4.59  | 7.87  | 7.40  | 2.70  | 5.99  | 10.87 | 10.04 | 9.44  | 18.17 | 3.86          | 4.42  | 7.00  | 3.33  | 1.14  | 1.08  |
| FeO             | 4.04           | 5.62  | 3.23  | 1.64  | 5.74  | 3.50  | 3.37  | 1.95  | 3.04  | 2.85  | 5.18          | 7.63  | 5.06  | 1.57  | 3.99  | 3.26  |

|       |       |       |       |       |       |       |       |       |       |       |       |       |        |       |        |       |
|-------|-------|-------|-------|-------|-------|-------|-------|-------|-------|-------|-------|-------|--------|-------|--------|-------|
| MnO   | 0.33  | 0.21  | 0.21  | 0.23  | 0.35  | 0.31  | 0.41  | 0.45  | 0.24  | 0.01  | 0.36  | 0.40  | 0.54   | 0.10  | 0.18   | 0.11  |
| MgO   | 2.70  | 3.32  | 5.31  | 3.41  | 3.18  | 3.48  | 1.53  | 3.00  | 1.18  | 3.79  | 5.14  | 6.84  | 6.99   | 0.33  | 1.45   | 0.98  |
| CaO   | 20.05 | 20.04 | 21.63 | 16.51 | 16.06 | 16.68 | 12.72 | 8.15  | 5.93  | 0.74  | 21.12 | 18.31 | 18.70  | 7.84  | 9.30   | 5.83  |
| Na2O  | 3.09  | 0.16  | 0.41  | 7.54  | 0.12  | 0.15  | 1.07  | 0.29  | 4.18  | 1.91  | 2.38  | 2.79  | 3.78   | 9.01  | 5.03   | 4.60  |
| K2O   | 3.71  | 4.84  | 3.38  | 1.86  | 7.92  | 6.05  | 6.13  | 8.17  | 8.29  | 8.28  | 3.14  | 2.14  | 1.58   | 4.82  | 7.87   | 7.48  |
| P2O5  | 1.26  | 1.24  | 0.76  | 1.32  | 0.85  | 0.92  | 1.07  | 2.23  | 0.06  | 0.70  | 1.25  | 1.00  | 1.56   | 1.00  | 0.84   | 0.34  |
| H2O-  | 0.19  | 0.08  | 0.14  | 0.29  | 0.24  | 0.10  | 0.08  | 0.26  | 0.13  | 0.12  | 0.04  | 0.16  | <0.01  | 0.07  | 0.08   | 0.08  |
| CO2   | 5.81  | 7.26  | 9.96  | 3.74  | 11.57 | 6.78  | 1.06  | 0.58  | 0.20  | 0.20  | 9.1   | 4.59  | 3.96   | 5.95  | 6.92   | 4.33  |
| F     | 0.31  | 0.39  | 0.58  | 0.60  | 0.60  | 0.47  | 0.20  | 0.37  | 0.10  | 1.10  | 0.11  | 0.09  | 0.13   | 0.08  | 0.18   | 0.08  |
| -O(F) | 0.13  | 0.16  | 0.24  | 0.25  | 0.25  | 0.20  | 0.08  | 0.16  | 0.04  | 0.46  | 0.05  | 0.04  | 0.05   | 0.03  | 0.07   | 0.03  |
| Summ  | 99.59 | 99.80 | 96.78 | 98.59 | 98.29 | 98.51 | 99.57 | 98.26 | 98.86 | 99.02 | 99.15 | 99.26 | 100.36 | 99.63 | 100.30 | 99.57 |
| V     | 340   | 134   | 141   | 358   | 218   | 238   | 666   | 347   | 1009  | 444   | 139   | 230   | 310    | 91.1  | 48.4   | 36.8  |
| Cr    | 26.4  | 10.3  | 15.4  | 45.1  | 10.9  | 10.7  | 37.8  | 19.2  | 64.6  | 76.0  | 124   | 212   | 203    | 36.5  | 13.0   | 18.0  |
| Co    | 11.3  | 20.0  | 29.5  | 10.5  | 14.4  | 16.8  | 7.4   | 16.8  | 2.5   | 7.7   | 17.0  | 24.5  | 18.5   | 1.2   | 3.4    | 5.2   |
| Ni    | 32.4  | 10.0  | 25.2  | 4.9   | 8.1   | 6.0   | 14.0  | 6.3   | 22.6  | 17.6  | 41.4  | 68.8  | 51.6   | 4.4   | 5.9    | 4.6   |
| Cu    | 14.6  | 19.6  | 52.9  | 10.6  | 19.2  | 15.7  | 7.8   | 23.7  | 7.8   | 7.7   | 15.5  | 30.1  | 16.1   | 2.9   | 3.6    | 3.3   |
| Zn    | 155   | 192   | 179   | 135   | 199   | 186   | 164   | 214   | 92    | 100   | 130   | 175   | 189    | 19.3  | 149    | 75.3  |
| Rb    | 60.4  | 92.1  | 87.5  | 66.0  | 197.4 | 150.5 | 132.1 | 220.9 | 147.0 | 227.9 | 108   | 94.7  | 44.8   | 96.0  | 204    | 194   |
| Sr    | 1351  | 1807  | 1857  | 1426  | 2254  | 1358  | 628   | 938   | 1779  | 121   | 1513  | 1002  | 755    | 1096  | 1296   | 1227  |
| Y     | 54.4  | 25.2  | 18.3  | 48.8  | 53.5  | 46.0  | 70.9  | 62.1  | 0.96  | 21.2  | 21.9  | 21.8  | 22.2   | 17.6  | 14.3   | 13.5  |
| Zr    | 567   | 255   | 68.8  | 362   | 356   | 438   | 848   | 616   | 339   | 361   | 286   | 230   | 293    | 1535  | 635    | 1358  |
| Nb    | 86.5  | 144   | 67.1  | 167   | 155   | 240   | 334   | 384   | 110   | 426   | 51.5  | 62.3  | 147    | 183   | 186    | 272   |
| Cs    | 1.86  | 1.93  | 1.84  | 1.59  | 3.05  | 0.68  | 0.35  | 1.08  | 0.11  | 3.29  | 2.52  | 2.02  | 0.91   | 4.40  | 4.08   | 3.66  |

|    |      |      |       |      |      |      |      |      |      |      |      |      |      |      |      |      |
|----|------|------|-------|------|------|------|------|------|------|------|------|------|------|------|------|------|
| Ba | 168  | 667  | 20807 | 1889 | 2800 | 1790 | 809  | 1989 | 1680 | 2200 | 6098 | 475  | 614  | 892  | 1718 | 1761 |
| La | 39.6 | 88.1 | 174.5 | 85.1 | 175  | 97.9 | 46.4 | 119  | 33.3 | 68.3 | 65.8 | 59.8 | 51.9 | 29.7 | 33.2 | 121  |
| Ce | 73.9 | 114  | 170   | 126  | 202  | 138  | 72.5 | 189  | 35.8 | 95.3 | 139  | 132  | 126  | 67.6 | 73.2 | 194  |
| Pr | 9.04 | 10.9 | 13.1  | 12.5 | 17.5 | 13.5 | 8.08 | 20.8 | 2.89 | 7.22 | 17.1 | 16.2 | 16.5 | 8.17 | 8.47 | 18.0 |
| Nd | 37.9 | 36.1 | 37.7  | 42.8 | 55.2 | 47.4 | 31.2 | 79.3 | 7.10 | 19.5 | 62.3 | 59.9 | 62.3 | 29.9 | 30.0 | 53.1 |
| Sm | 10.2 | 7.57 | 6.47  | 9.94 | 10.1 | 9.33 | 7.76 | 16.6 | 0.73 | 3.15 | 11.3 | 10.7 | 12.1 | 5.64 | 5.81 | 6.54 |
| Eu | 3.31 | 2.46 | 1.18  | 3.49 | 3.22 | 2.96 | 2.52 | 5.00 | 0.18 | 0.71 | 2.56 | 2.80 | 3.20 | 1.61 | 1.62 | 1.31 |
| Gd | 8.42 | 7.13 | 5.28  | 10.2 | 10.7 | 9.47 | 7.35 | 14.9 | 0.44 | 2.67 | 8.07 | 8.11 | 8.97 | 4.64 | 4.27 | 4.14 |
| Tb | 1.35 | 1.06 | 0.76  | 1.60 | 1.53 | 1.48 | 1.24 | 2.14 | 0.04 | 0.40 | 1.09 | 1.06 | 1.17 | 0.68 | 0.61 | 0.57 |
| Dy | 7.79 | 5.50 | 3.75  | 9.29 | 8.92 | 8.39 | 7.99 | 11.7 | 0.18 | 2.60 | 5.34 | 5.28 | 5.74 | 3.87 | 3.25 | 2.96 |
| Ho | 1.57 | 0.95 | 0.66  | 1.82 | 1.79 | 1.54 | 1.81 | 2.21 | 0.03 | 0.58 | 0.94 | 0.90 | 0.98 | 0.78 | 0.60 | 0.59 |
| Er | 4.00 | 2.20 | 1.43  | 4.31 | 4.13 | 3.88 | 5.48 | 5.28 | 0.07 | 1.67 | 2.16 | 2.18 | 2.47 | 2.22 | 1.60 | 1.70 |
| Tm | 0.63 | 0.23 | 0.17  | 0.55 | 0.57 | 0.49 | 0.84 | 0.69 | 0.01 | 0.24 | 0.32 | 0.33 | 0.37 | 0.34 | 0.23 | 0.26 |
| Yb | 3.67 | 1.11 | 0.83  | 3.02 | 3.32 | 2.95 | 5.70 | 4.08 | 0.08 | 1.53 | 2.14 | 2.22 | 2.67 | 2.29 | 1.52 | 1.79 |
| Lu | 0.51 | 0.12 | 0.09  | 0.41 | 0.48 | 0.42 | 0.76 | 0.56 | 0.01 | 0.24 | 0.36 | 0.41 | 0.51 | 0.38 | 0.24 | 0.28 |
| Hf | 4.27 | 2.27 | 1.23  | 5.05 | 6.17 | 6.98 | 7.71 | 10.1 | 2.82 | 4.62 | 2.99 | 2.77 | 5.23 | 32.6 | 13.6 | 23.3 |
| Ta | 3.66 | 2.88 | 1.79  | 6.05 | 3.91 | 4.64 | 4.46 | 12.0 | 0.36 | 8.40 | 7.86 | 9.97 | 17.8 | 68.2 | 82.3 | 81.2 |
| Pb | 2.03 | 4.09 | 11.5  | 12.8 | 16.4 | 7.85 | 6.04 | 15.3 | 2.95 | 6.28 | 2.82 | 1.78 | 1.92 | 2.64 | 25.8 | 2.64 |
| Th | 1.61 | 0.69 | 2.03  | 1.00 | 3.53 | 2.33 | 1.09 | 5.77 | 0.27 | 2.23 | 4.01 | 4.05 | 5.41 | 9.14 | 4.26 | 10.1 |
| U  | 1.65 | 1.56 | 3.22  | 2.50 | 2.40 | 4.35 | 3.01 | 3.56 | 1.14 | 4.50 | 0.68 | 0.84 | 1.69 | 18.6 | 49.2 | 16.3 |

1-10 – Bolshaya Tagna: 1, 2 – ijolites, 3 – melteigites, 4 – urtites, 5, 6 – nephelinite, 7, 8 – nepheline syenite, 9 – aegirine syenite, 10 – feldspar syenite;; 11-16 – Srednaya Zima complex: 11-13 – ijolite - melteigite, 14-16 –syenite;
